# Supplementary material for: Palbociclib and Fulvestrant Act in Synergy to Modulate Central Carbon Metabolism in Breast Cancer Cells
Source: MDPI journal article supplement (doi:10.3390/metabo9010007), 2019-01-02
Supplement: s1 [file s1]

## Supplemental Figures

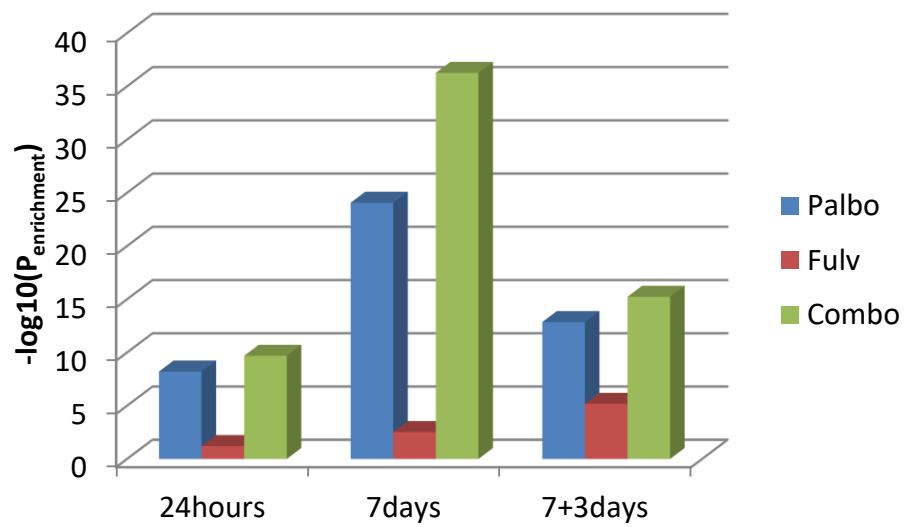

**Figure S1.** The enrichment of metabolic genes among those modulated by drug treatments. The statistical significance of over-representation was determined using cumulative hypergeometric distribution.

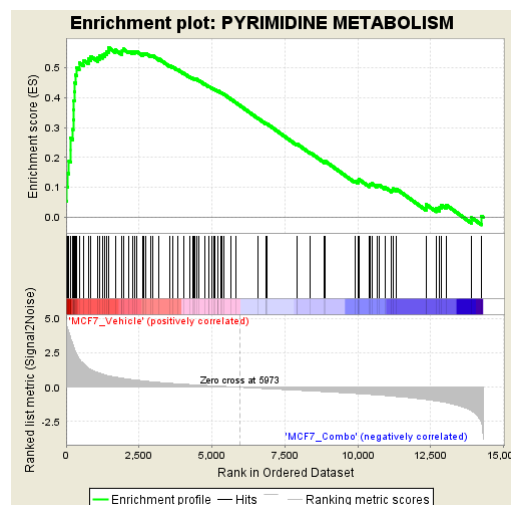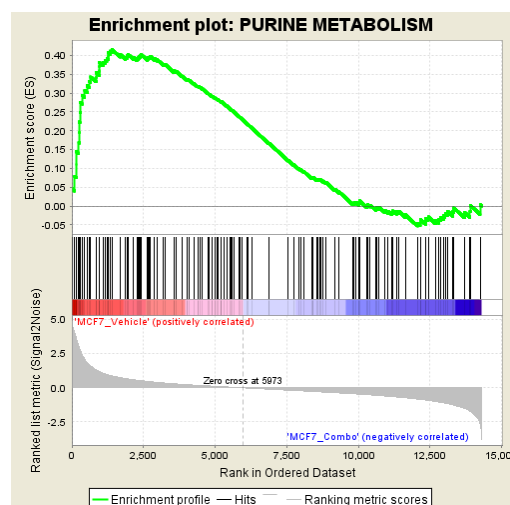

**Figure S2.** GSEA enrichment plot of pyrimidine metabolism and purine metabolism (FDR  $q = 4.92\text{E}^{-5}$  and  $3.83\text{E}^{-2}$ ), 24hr combo treatment.
